# Supplementary material for: The Validity of Functional Near-Infrared Spectroscopy Recordings of Visuospatial Working Memory Processes in Humans
Source: MDPI journal article supplement (doi:10.3390/brainsci8040062), 2018-04-05
Supplement: s1 [file s1]

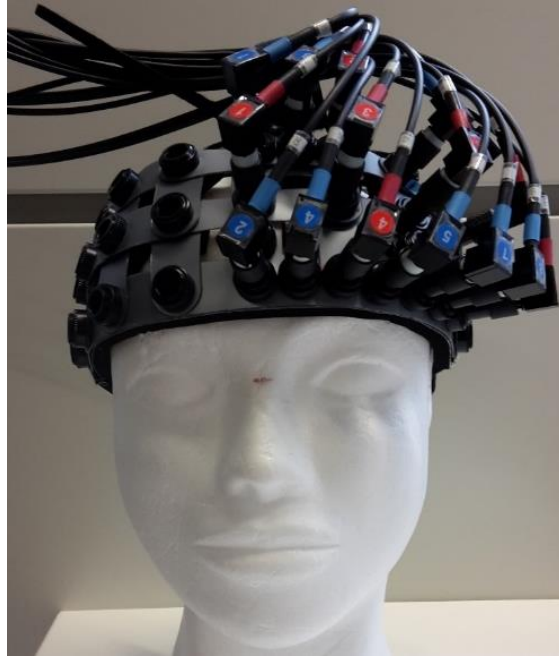

**Figure S1.** Image of probe holder mounted on the left forehead.

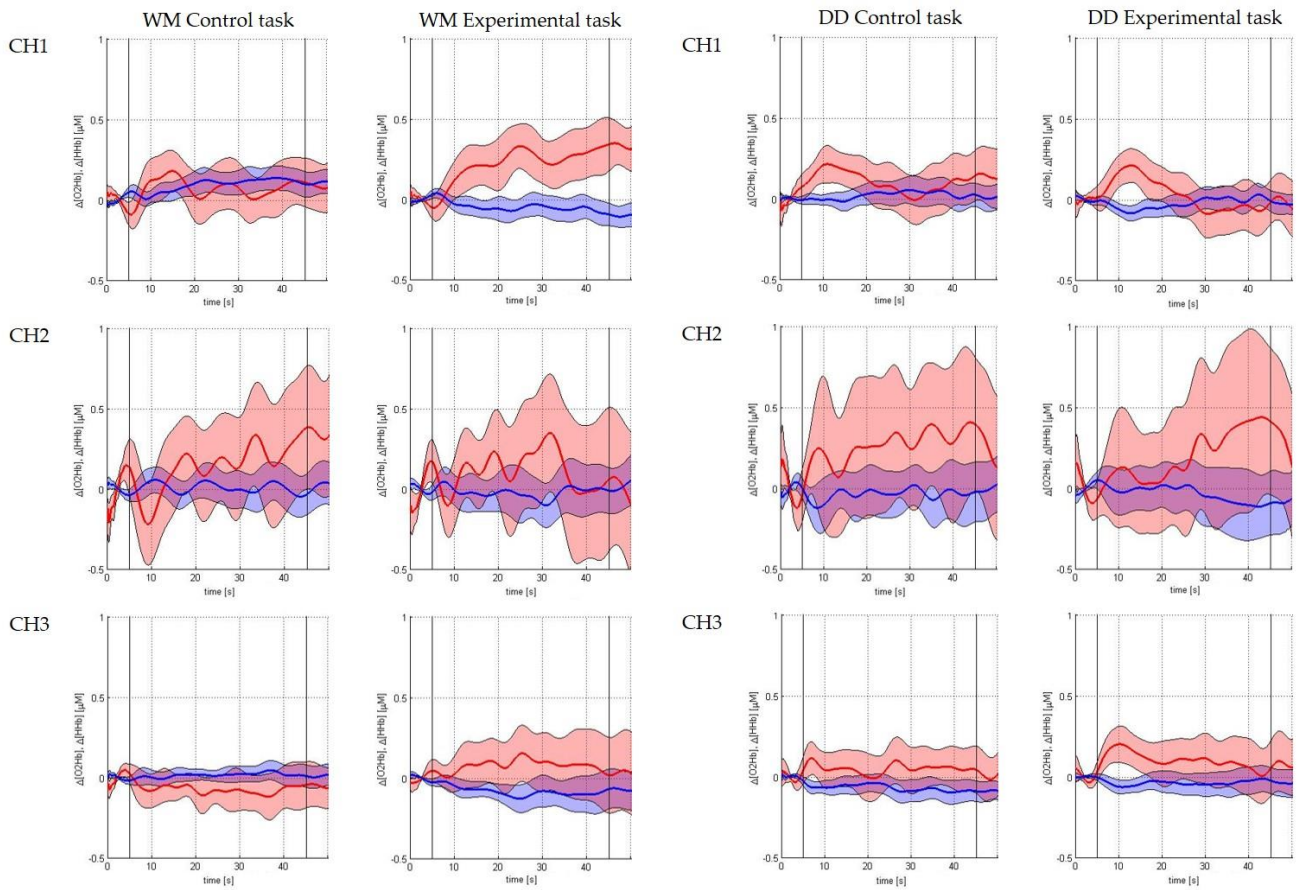

**Figure S2.** Grand averages and confidence intervals of evoked hemodynamic concentration changes across all subjects for Channels (CH) 1 to 3. Red line = oxygenated hemoglobin, blue line = deoxygenated hemoglobin, each with 95% confidence interval.
